# Supplementary material
Source: PubMed Central journal article supplement (PMC4534215)
Supplement: pnas.1505015112.sapp.pdf [file pnas.1505015112.sapp.pdf]

## Jack *et al.* Supporting Information

### Materials and Methods

#### **Yeast strains and media**

Yeast deletion strains (Table S1) were created by standard methods: deletion cassettes were amplified from the pFA6a plasmid series (1, 2), pFA6a-*LEU2* or pFA6a-*URA3* (3) using the primers listed in Table S2. Plasmid construction was by standard methods, details are given in Table S3. Cells were grown at 30° on synthetic media (0.69% w/v YNB with ammonium sulfate, amino acids, 2% w/v sugar). Media components were purchased from Formedium. Rapamycin (SCBT) was used at 25nM, nicotinamide (Sigma) at 5mM. For 5 FOA selection, synthetic media containing the appropriate amino acids was supplemented with 1 mg/ml 5 FOA (Formedium) and 50 µg/ml uracil. Growth curves were acquired using a BMG Fluostar system, cells were inoculated in liquid media at OD<sub>0.05</sub>, maintained at 30° and OD<sub>600</sub> measured every 30 min for 1-3 days with orbital shaking at 500 rpm between reads.

#### **PFGE determination of rDNA copy number**

Cells were streaked on four successive plates (~60 generations) except where stated otherwise and grown in liquid media to stationary phase. PFGE assays were performed as described (4) using 0.8% w/v agarose gels, and probed for rDNA intergenic spacer 2. Where multiple samples are shown these represent independent plasmid transformants. Copy number distribution plots were obtained by quantifying each lane using the AIDA software (FUJI), normalising for the total signal in each lane and then averaging the profile for each experimental condition.

#### **qPCR analysis of rDNA copy number**

Genomic DNA was extracted from cells on plates by re-suspension in 200µl FLB (2% v/v Triton-X100, 1% w/v SDS, 100mM NaCl, 1mM EDTA, 10mM Tris pH8) with 200µl phenol:chloroform and 50µl glass beads, and 5 minutes vortexing. The aqueous phase was then ethanol precipitated and re-suspended in 100µl TE. 5µl of DNA was digested with *EcoRI* (4U) and 0.2µg RNase A in 10µl then purified using QIAQuick PCR Purification columns into 30µl. qPCR reactions were performed on 1µl DNA in 10µl using Maxima Probe Mix (Thermo Scientific) with 0.1µM probes and 0.3µM each primer pair (see Table S5). Thermal cycling conditions were 95°C 10 min, then 40 cycles of 95°C 15 seconds, 60°C 30 seconds with plate read. qPCR plates were run on Bio Rad CFX96 machines and analysed using Bio Rad CFX Manager v2. Prior to analysis the baseline threshold of each fluorophore was set to 50.

#### **Northern analysis**

RNA was extracted using the GTC-phenol method, glyoxylated, separated on a 1.2% agarose gel and probed with a random primed PCR product to ITS1 (made by PCR of GGCAAGAGCATGAGAGCTTTTA and CCAGTTACGAAAATTCTTGTT on genomic DNA) in Church Hyb at 60° as described (5), then washed 2x 20 min with 0.5x SSC 0.1% w/v SDS at 60°.

#### **qPCR analysis of *PNC1* expression**

1µg RNA was treated with 1µg RNase-free DNase (Thermo), purified by phenol:chloroform extraction and reverse transcribed with Superscript III (Life Technologies) according to manufacturer's instructions. cDNA was diluted 1:2.5-1:25 and 1µl analysed per 10µl qPCR reaction using Maxima SYBR Mix (Thermo) with 0.3µM primers. Thermal cycling conditions were 95°C 10 min, then 40 cycles of 95°C 15 seconds, 60°C 30 seconds with plate read, plates were run on Bio Rad CFX96 machines and analysed using Bio Rad CFX Manager v2.

**Figures**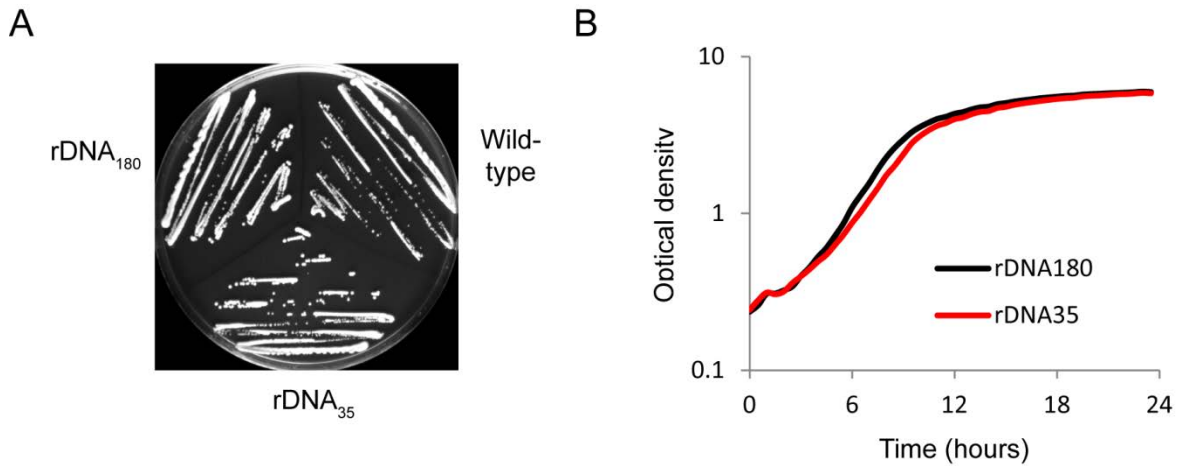

**Fig. S1:** Growth of rDNA<sub>35</sub> and rDNA<sub>180</sub> cells. A) Growth of rDNA<sub>35</sub> cells compared to isogenic rDNA<sub>180</sub> cells on a YPD plate, with a BY4741 wild-type control. B) Growth of rDNA<sub>35</sub> and rDNA<sub>180</sub> cells in liquid synthetic media at 30°, data shows averages of seven cultures from three biological replicates of each genotype. Doubling times at mid-log: rDNA<sub>180</sub> – 1:58 hours, rDNA<sub>35</sub> – 2:04 hours. Over the 60 generations used for experiments in this work, this difference is insufficient to explain more than a minimal selectivity towards the cells with higher rDNA copy number.

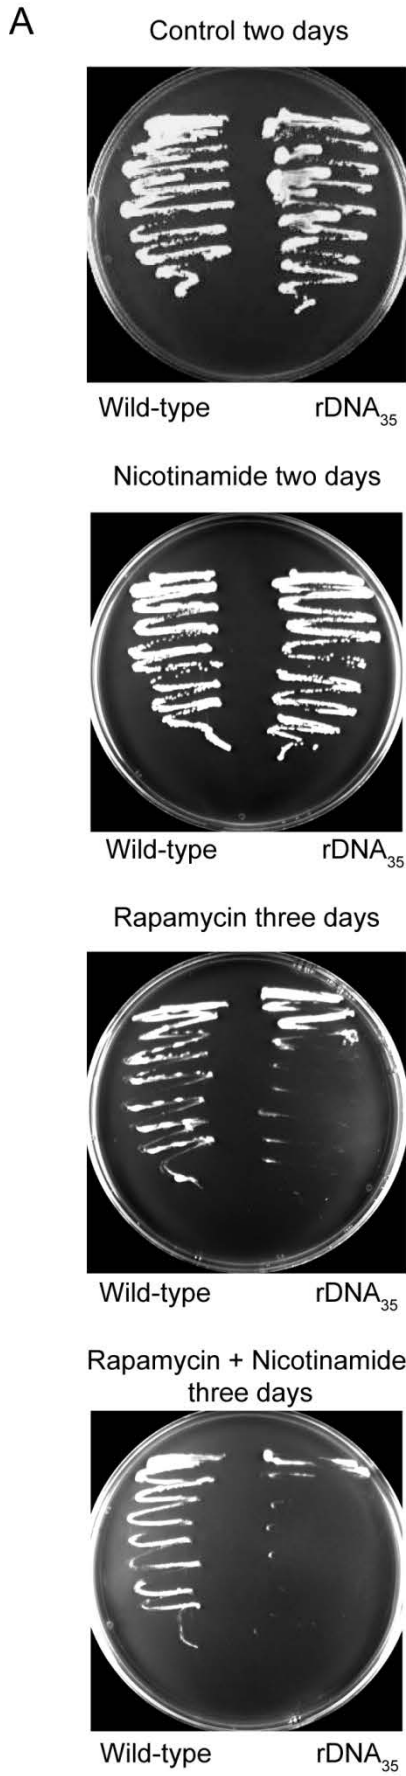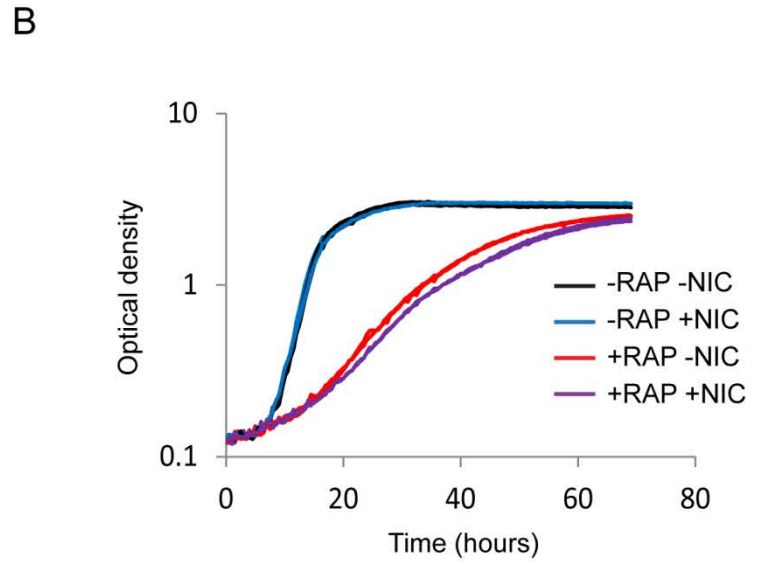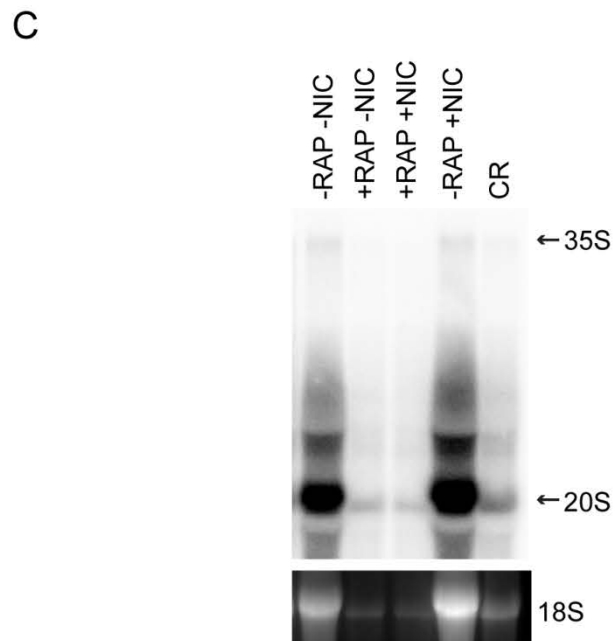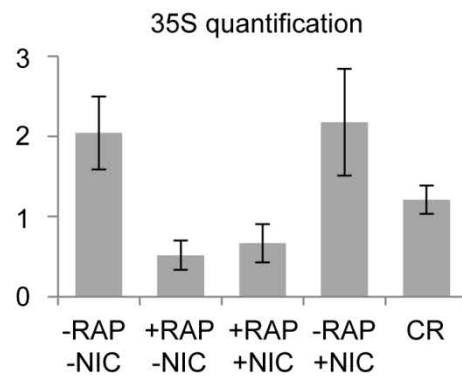

**Fig. S2:** Growth and transcriptional effects of nicotinamide treatment. A) Growth of wild-type and rDNA<sub>35</sub> cells on synthetic media plates in the presence of 25nM rapamycin (RAP) and/or 5mM nicotinamide (NIC). Plates were grown at 30°. B) Growth of rDNA<sub>35</sub> cells in liquid synthetic complete media at 30° containing 25nM rapamycin (RAP) and/or 5mM nicotinamide (NIC). Each curve represents an average of eight cultures, two biological replicates were performed for each drug combination (both are shown but are inseparable over this long time-course). C) Northern analysis of pre-rRNA species in rDNA<sub>35</sub> under the same drug combinations as in A/B. Caloric restriction (CR), growth in 0.05% w/v glucose, is also included for comparison with data in Fig. 4 and Fig. S6. Each lane contains RNA from 1.0±0.2 ODs of cells, 35S and 20S were detected using a probe to rDNA intergenic spacer 1, 18S is shown by ethidium staining. For quantification of 35S, error bars represent 95% CI, n=3.

A

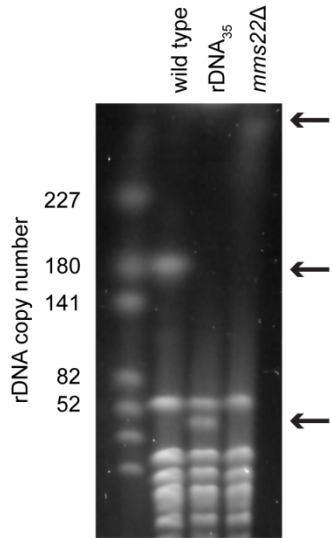

B

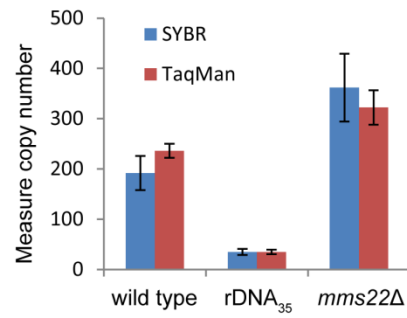

C

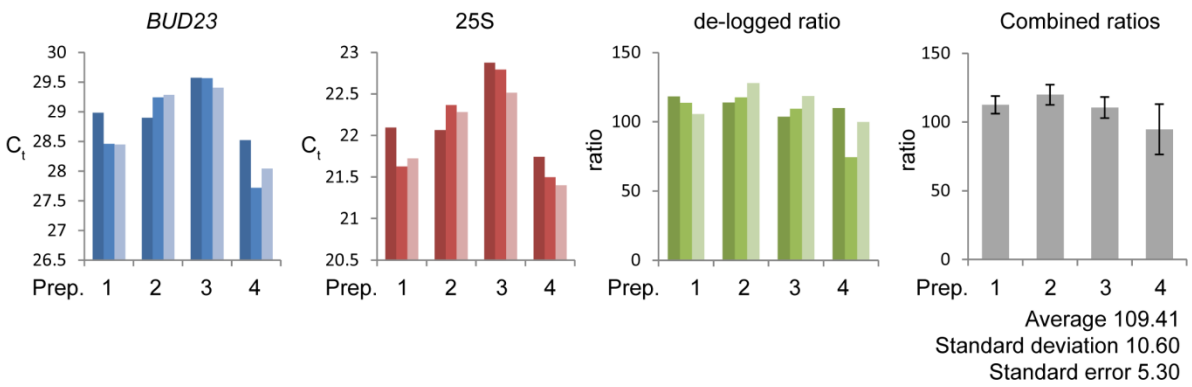

D

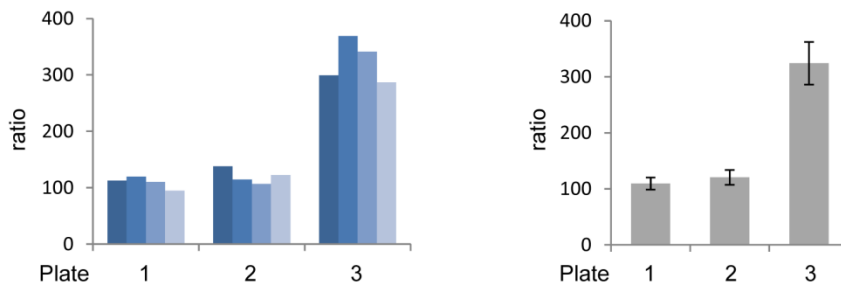

**Fig. S3:** Development of a qPCR assay for rDNA copy number. qPCR assays for the measurement of rDNA copy number changes are challenging as the changes are often less than two-fold. We therefore set up a multiplex assay for copy number measurements using multiple technical replicates to improve accuracy and multiple clones to allow statistical analysis. A) PFGE analysis of rDNA copy number in test strains wild type BY4741, rDNA<sub>35</sub> and *mms22Δ*, arrows indicate the chromosome XII bands for the three strains. B) Comparison of measured rDNA copy number in these strains by SYBR green and TaqMan multiplex qPCR, both using primer sets in the rDNA 25S region and the single copy *BUD23* gene. Measured copy numbers have been normalised to 35 repeats for the rDNA<sub>35</sub> strain. For each strain, four qPCR reactions of each type were performed on a single DNA sample, error bars  $\pm 1$  s.d. The measured copy number by PFGE does differ from the copy number measured by qPCR, however, this difference is relatively small and should affect all samples equally within one experiment. Note that the s.d. is much lower in the TaqMan samples. C) Variability across DNA preparation and qPCR. Four DNA preparations were performed from cells on the same plate, and three qPCR reactions were performed for each. Individual  $C_t$  values are shown for each primer set, along with the ratio of de-logged  $C_t$  values. A single qPCR reaction from preparation 4 deviates slightly from the others. Average ratio and SEM for each DNA preparation were calculated; note that preparation 4 gives a lower value with higher standard error. A single average ratio was then calculated from these four individual preparations; despite the variability of the individual measurements, the standard error of the calculated ratio is small (less than 5%). Different DNA preparations used in this work derived from different clones or at least different cell populations, so large standard errors indicate variability between cells/clones rather than technical variability in copy number measurement. D) Variability between plates. We noticed that although measured ratios were highly consistent within a single plate, they could vary greatly between plates, and particularly between plates run on different (identical) qPCR machines. Here, twelve DNA preparations were made from wild type cells on the same YPD plate and assayed on three different qPCR plates (each bar represents a different DNA preparation and the shown value is an average of three qPCR reactions with SEM). Set 3 deviates markedly from sets 1 and 2, though within a plate the variability is low. We therefore ensured that experiments were performed on a single plate where possible. Where replicate experiments were run on different plates, all calculated ratios were divided by the median ratio for that plate before plates were combined. When more samples needed to be assayed than could fit on one plate (notably in Fig. 2), a selection of samples were run on all the plates and the median of these samples used to normalise the other ratios. Note that the ratios calculated by qPCR are not a direct readout of copy number, instead each experiment needs to be normalised such that the rDNA copy number of the parental strain matches the value measured by PFGE.

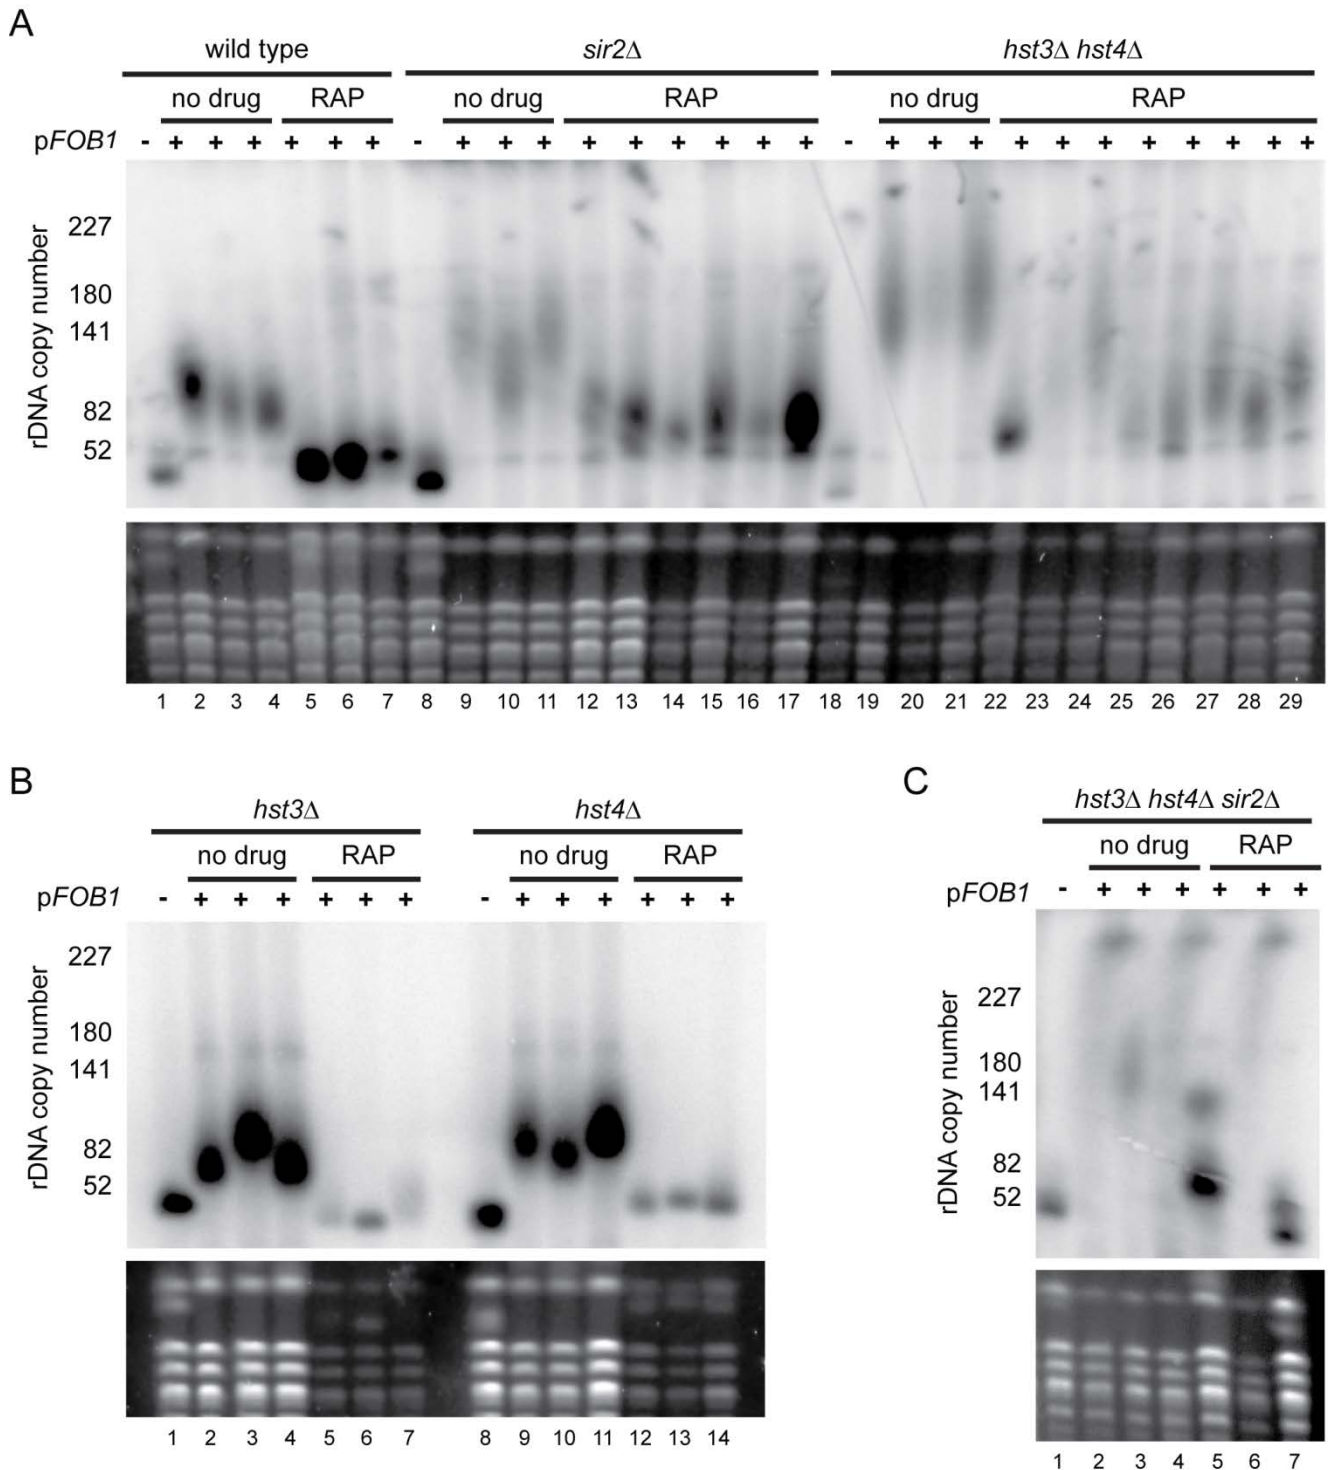

**Fig. S4:** Effects of HDAC mutations on rDNA expansion. A) rDNA copy number analysis of HDAC mutants in the presence or absence of rapamycin. Experiment is identical to Fig. 2, but a wider set of independent *pFOB1* transformants are shown for *sir2Δ* and *hst3Δ hst4Δ* cells treated with rapamycin. Note the massive variation between different clones of *rDNA<sub>35</sub> hst3Δ hst4Δ* on rapamycin despite identical treatment, reflected in the large confidence interval for these cells in quantification for Fig. 2. B) rDNA copy number analysis of *rDNA<sub>35</sub> hst3Δ* and *rDNA<sub>35</sub> hst4Δ* cells in the absence or presence of rapamycin; experiments were performed as in Fig. 2. C) rDNA copy number analysis of *rDNA<sub>35</sub> hst3Δ hst4Δ sir2Δ* in the presence or absence of rapamycin, revealing levels of clone-to-clone variation that precluded further analysis.

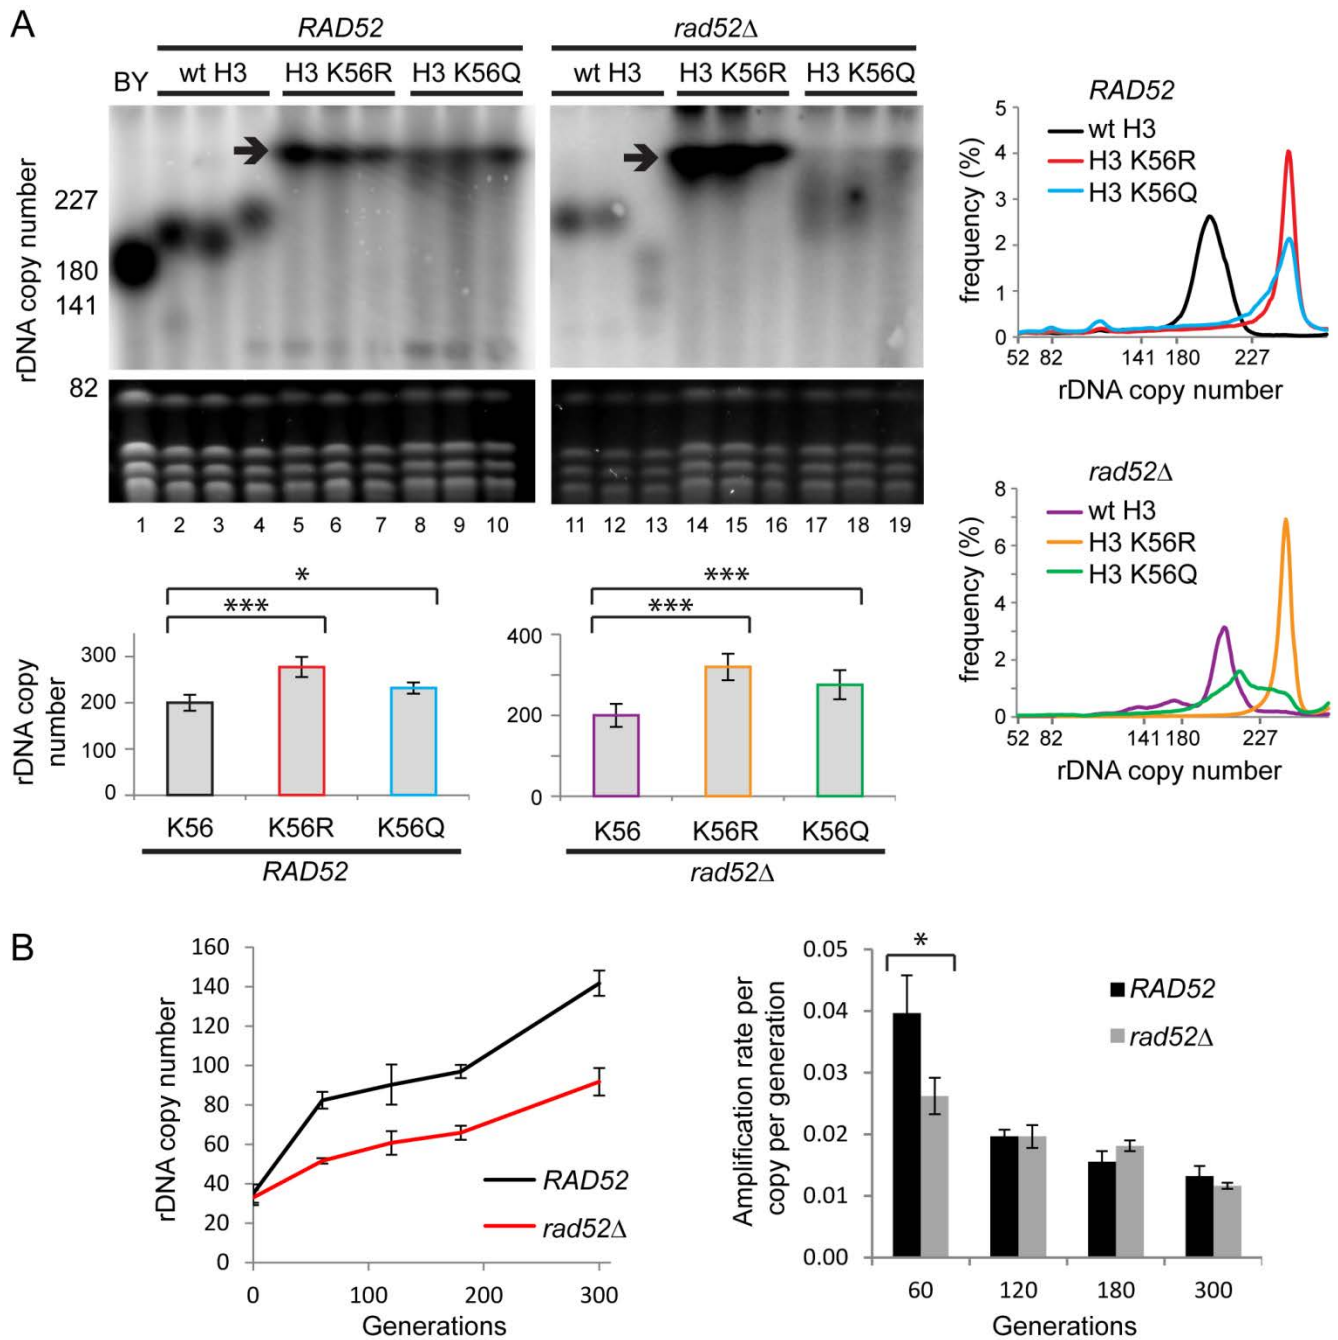

**Fig. S5:** rDNA amplification in the presence and absence of Rad52. A) *RAD52* was deleted in cells expressing H3 only from a counter-selectable plasmid, then a plasmid shuffle was performed to exchange the H3 plasmid for one expressing wild-type H3 (lanes 2-4 & 11-13) or mutant H3 K56 (lanes 5-10 & 14-19) (6). Three clones from each plasmid transformation were analysed, DNA from BY4741 wild-type cells is shown in lane 1 for comparison. The clone in lane 13 has formed a split population during culture post-transformation. Many further clones were analysed by qPCR due to considerable variability in copy number, but the trend visible by PFGE was always observed. For quantification, error bars represent 95% CI, \*-  $P < 0.05$ , \*\*\*-  $P < 0.01$  by one-way ANOVA,  $n=15$  for *RAD52* and  $n=9$  for *rad52Δ*, B) rDNA copy number measured by qPCR of *rDNA<sub>35</sub>* and *rDNA<sub>35</sub>* *rad52Δ* cells, monitored over ~240 generations after *pFOB1* transformation, error bars represent 95% CI (left). Rate of rDNA amplification per repeat per generation calculated from the same data (right). For quantification, error bars represent 95% CI, \*-  $P < 0.05$  by Student's *t*-test,  $n=3$ .



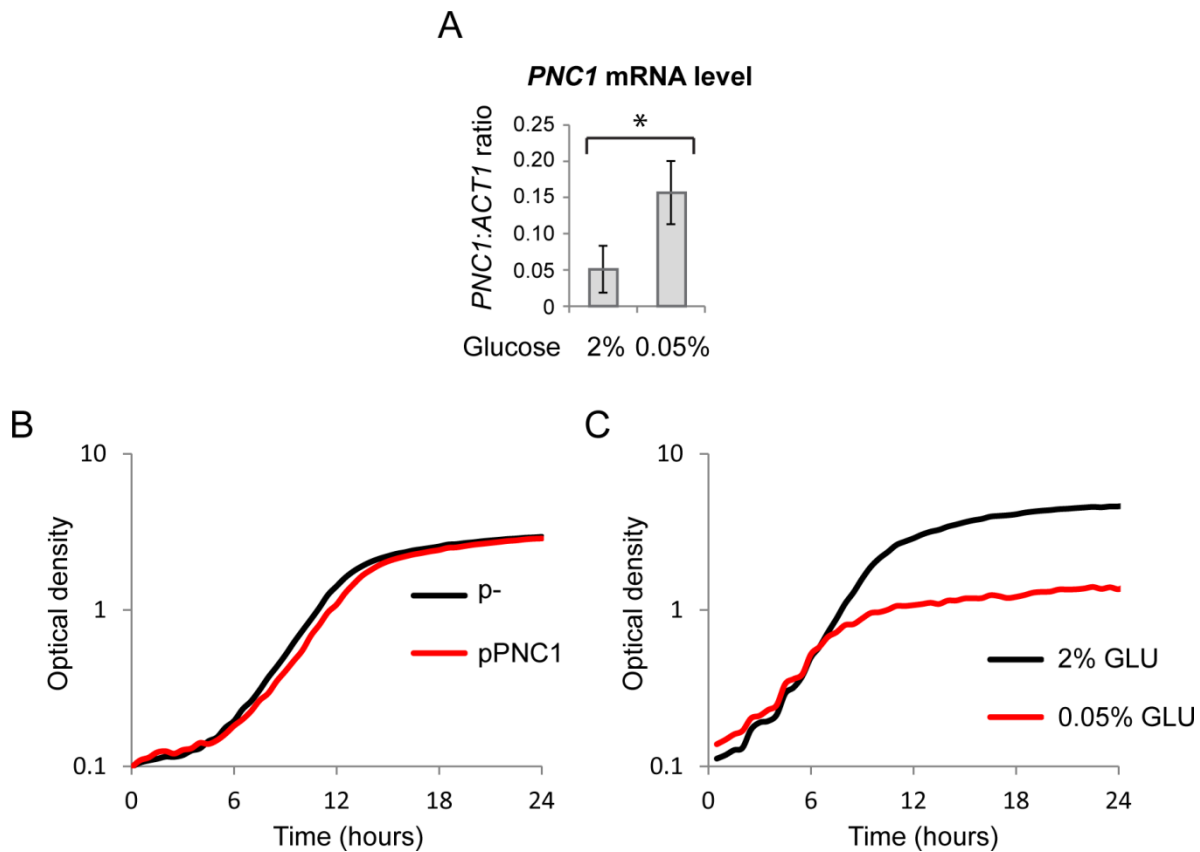

**Fig. S6:** Relationships between *PNC1* expression, glucose concentration and growth rate A) Expression of *PNC1* relative to *ACT1* in rDNA<sub>35</sub> cells grown in 2% or 0.05% w/v glucose measured by qPCR. Error bars represent 95% CI, \*-  $P < 0.05$  by Student's *t*-test,  $n=7$  for 2% glucose,  $n=3$  for 0.05% glucose. B) Growth of rDNA<sub>35</sub> cells carrying an empty vector or a high-copy *PNC1* plasmid in liquid synthetic media at 30°, data shows averages of seven cultures from three biological replicates of each genotype. C) Growth of rDNA<sub>35</sub> cells in liquid synthetic media containing 2% or 0.05% w/v glucose at 30°, data shows averages of eight cultures from three biological replicates of each genotype.

**Tables****Table S1: Strains used in this study**

Note that strains transformed with p*FOB1* are not listed. We do not routinely keep these strains as copy number changes during freeze-thaw, and always work with fresh plasmid transformants.

| Strain number | Strain Name                                | Genotype                                                                                                                          | Source     |
|---------------|--------------------------------------------|-----------------------------------------------------------------------------------------------------------------------------------|------------|
| YJH2          | BY4741                                     | <i>MATa his3Δ1 leu2Δ0 met15Δ0 ura3Δ0</i>                                                                                          | EUROSCARF  |
| YCJ084        | AKY1968                                    | <i>hht1-hhf1Δ::LEU2 hht2 hhf2Δ::HIS3 pPK189</i>                                                                                   | (6)        |
| YCJ085        | AKY1968 pMP3                               | <i>hht1-hhf1Δ::LEU2 hht2 hhf2Δ::HIS3 pMp3</i>                                                                                     | (6)        |
| YCJ086        | AKY1968 pAK965                             | <i>hht1-hhf1Δ::LEU2 hht2 hhf2Δ::HIS3 pAK965</i>                                                                                   | (6)        |
| YCJ090        | AKY1968 pAK973                             | <i>hht1-hhf1Δ::LEU2 hht2 hhf2Δ::HIS3 pAK973</i>                                                                                   | (6)        |
| YCJ104        | AKY1968 <i>rad52Δ</i><br>pMP3              | <i>hht1-hhf1Δ::LEU2 hht2 hhf2Δ::HIS3</i><br><i>rad52::NatMX6 plus pMP3</i>                                                        | This study |
| YCJ100        | AKY1968 <i>rad52Δ</i><br>pAK965            | <i>hht1-hhf1Δ::LEU2 hht2 hhf2Δ::HIS3</i><br><i>rad52::NatMX6 pAK965</i>                                                           | This study |
| YCJ102        | AKY1968 <i>rad52Δ</i><br>pAK973            | <i>hht1-hhf1Δ::LEU2 hht2 hhf2Δ::HIS3</i><br><i>rad52::NatMX6 pAK973</i>                                                           | This study |
| YCJ083        | NOY1071                                    | <i>MATa ade2-1 ura3-1 trp1-1 leu2-3,112 his3-11</i><br><i>can1-100 fob1Δ::HIS3 (~35 rDNA repeats)</i>                             | (7)        |
| YCJ091        | NOY1071 <i>rad52Δ</i>                      | <i>MATa ade2-1 ura3-1 trp1-1 leu2-3,112 his3-11</i><br><i>can1-100 fob1Δ::HIS3 rad52::NatMX6</i>                                  | This study |
| YCJ292        | NOY1071 <i>dun1Δ</i>                       | <i>MATa ade2-1 ura3-1 trp1-1 leu2-3,112 his3-11</i><br><i>can1-100 fob1Δ::HIS3 dun1::TRP1</i>                                     | This study |
| YCJ305        | NOY1071 <i>dun1Δ</i><br><i>rad52Δ</i>      | <i>MATa ade2-1 ura3-1 trp1-1 leu2-3,112 his3-11</i><br><i>can1-100 fob1Δ::HIS3 dun1::TRP1 rad52::LEU2</i><br><i>pRS316 FOB1</i>   | This study |
| YCJ247        | NOY1071 <i>sir2Δ</i>                       | <i>MATa ade2-1 ura3-1 trp1-1 leu2-3,112 his3-11</i><br><i>can1-100 fob1Δ::HIS3 sir2::LEU2</i>                                     | This study |
| YCJ270        | NOY1071 <i>hst4Δ</i><br><i>hst3Δ</i>       | <i>MATa ade2-1 ura3-1 trp1-1 leu2-3,112 his3-11</i><br><i>can1-100 fob1Δ::HIS3 hst4::LEU2</i><br><i>hst3::HygMX6</i>              | This study |
| YCJ271        | NOY1071 <i>hst4Δ</i><br><i>hst3Δ sir2Δ</i> | <i>MATa ade2-1 ura3-1 trp1-1 leu2-3,112 his3-11</i><br><i>can1-100 fob1Δ::HIS3 hst4::LEU2</i><br><i>hst3::HygMX6 sir2::NatMX6</i> | This study |
| YCC408        | NOY1071 <i>hst3Δ</i>                       | <i>MATa ade2-1 ura3-1 trp1-1 leu2-3,112 his3-11</i><br><i>can1-100 fob1::HIS3 hst3::KanMX6</i>                                    | This study |
| YCJ264        | NOY1071 <i>hst4Δ</i>                       | <i>MATa ade2-1 ura3-1 trp1-1 leu2-3,112 his3-11</i><br><i>can1-100 fob1::HIS3 hst4::LEU2</i>                                      | This study |
| YCC405        | NOY1071 <i>hst1Δ</i>                       | <i>MATa ade2-1 ura3-1 trp1-1 leu2-3,112 his3-11</i><br><i>can1-100 fob1::HIS3 hst1::LKanMX6</i>                                   | This study |

**Table S2: Oligonucleotides used in this study**

| Primer number | Primer Name | Sequence                                                               | Primer use        |
|---------------|-------------|------------------------------------------------------------------------|-------------------|
| OCJ11         | HST4 DN45   | TGCATTAATTTTATCTCCAACCTTTTTTGGTAGGACAA<br>ATACTTTGAATTTCGAGCTCGTTTAAAC | HST4<br>deletion  |
| OCJ12         | HST4 UP45   | CAACTGTATTTTAAACTGTAAATAACTAAGCAGAA<br>CCACAAACGGATCCCCGGGTTAATTAAG    | HST4<br>deletion  |
| OCJ124        | HST3 UP45   | AAGGGATTAATTTACATACTAGATCCATCTTTCTC<br>AAAAATGCGGATCCCCGGGTTAATTAAG    | HST3<br>deletion  |
| OCJ125        | HST3 DN45   | TGCCTCGATTATTTATCGTTAACTCAATTTTAATAGTTA<br>AGTTTAGAATTCGAGCTCGTTTAAAC  | HST3<br>deletion  |
| OJH195        | RAD52 UP45  | TTGCCAAGAAGCTGCTGAAGGTTCTGGTGGCTTTGGTG<br>TGTTGTTGCGGATCCCCGGGTTAA     | RAD52<br>deletion |
| OJH196        | RAD52 DN45  | TAAATAATGATGCAAATTTTTTATTTGTTTCGGCCAGG<br>AAGCGTTCGATGAATTCGAGCTCGTT   | RAD52<br>deletion |
| OJH248        | SIR2 UP45   | AAGGGCGTGTATGTCGTTACATCAGATGAACATCCCA<br>AAACCTCCGGATCCCCGGGTTAATTAAG  | SIR2<br>deletion  |
| OJH249        | SIR2 DN45   | ATTGATATTAATTTGGCACTTTTAAATTATTAATGCC<br>TTCTACGAATTCGAGCTCGTTTAAAC    | SIR2<br>deletion  |
| OJH68         | DUN1 UP45   | AGTAAAGGGGCTTAACATACAGTAAAAAAGGCAATTA<br>TAGTGAAGCGGATCCCCGGGTTAATTAAG | DUN1<br>deletion  |
| OJH69         | DUN1 DN45   | AAAATCCAGATTCAAACAATGTTTTTGAATAATGCTT<br>CTCATGTGAATTCGAGCTCGTTTAAAC   | DUN1<br>deletion  |
| OJH107        | HST1 UP45   | CACCTTCTTCTTTTTTGTGTTTTTGTGAGAAAAAAA<br>ATCTAACGGATCCCCGGGTTAATTAAG    | HST1<br>deletion  |
| OJH108        | HST1 DN45   | TACATGAATGAAATGCTCGAATATATGCAATAGCAGC<br>GGTATACTGAATTCGAGCTCGTTTAAAC  | HST1<br>deletion  |
| OCC236        | PNC1 F5     | actgactgacGGATCCCCCTACGATCCTCCTTATATGAA                                | PNC1<br>cloning   |
| OCC237        | PNC1 R5     | actgactgacCTCGAGGGCGAGAAATAATGTCGGTAT                                  | PNC1<br>cloning   |

**Table S3: Plasmids used in this study**

| Plasmid number | Plasmid name   | Description                                                                                                    | Reference  |
|----------------|----------------|----------------------------------------------------------------------------------------------------------------|------------|
| PCJ02          | pPK189         | HHT2/HHF2 ARS/CEN/URA3                                                                                         | (6)        |
| CJ03           | pAK973         | H3 K56Q H4 ARS/CEN/TRP1                                                                                        | (6)        |
| pCJ04          | pPAK965        | H3 K56R H4 ARS/CEN/TRP1                                                                                        | (6)        |
| pCJ05          | pMP3           | HHT2 HHF2 ARS/CEN/TRP1                                                                                         | (8)        |
| pJH113         | pRS316<br>FOB1 | <i>Bam</i> HI- <i>Bam</i> HI <i>FOB1</i> fragment from pTAK101 (9)<br>cloned into <i>Bam</i> HI site of pRS316 | This study |
| pRH3           | pRS424<br>PNC1 | PCR OCC236-OCC237 on genomic DNA, cloned<br>into pRS424 using <i>Bam</i> HI and <i>Xho</i> I                   | This study |

**Table S4: qPCR primers and probes used in this study**

| Primer number | Primer Name    | Sequence                            |
|---------------|----------------|-------------------------------------|
| OJH579        | BUD23 F1       | GACCATGTGTGGTGTGGTTT                |
| OJH578        | BUD23 R1       | CCCATATCCTGCAACATCAA                |
| OJH626        | KK 25S F       | GAATCCATATCCAGGTTCCG                |
| OJH627        | KK 25S R       | GACGTGGGTTAGTCGATCCT                |
| OCJ155        | BUD23<br>Probe | [6FAM]CCTCCAGCTCTCACTAAGACCGG[BHQ1] |
| OCJ156        | 25S<br>Probe   | [HEX]AGGCCACCATCGAAAGGGAA[BHQ1]     |
| OJH475        | ACT1 1 F       | TCCTACGTTGGTGATGAAGC                |
| OJH474        | ACT1 1 R       | TTTCCATATCGTCCCAGTTG                |
| OCC268        | PNC1 F8        | TGTCGACAAGGGTTTCTTGA                |
| OCC269        | PNC1 R8        | CTCCAAAGCTACACCGACAA                |

**References**

1. Hentges P, Van Driessche B, Tafforeau L, Vandenhoute J, & Carr AM (2005) Three novel antibiotic marker cassettes for gene disruption and marker switching in *Schizosaccharomyces pombe*. *Yeast* 22(13):1013-1019.
2. Longtine MS, *et al.* (1998) Additional modules for versatile and economical PCR-based gene deletion and modification in *Saccharomyces cerevisiae*. *Yeast* 14(10):953-961.
3. Houseley J & Tollervey D (2011) Repeat expansion in the budding yeast ribosomal DNA can occur independently of the canonical homologous recombination machinery. *Nucleic Acids Res* 39(20):8778-8791.
4. Hage AE & Houseley J (2013) Resolution of budding yeast chromosomes using pulsed-field gel electrophoresis. *Methods Mol Biol* 1054:195-207.
5. Cruz C & Houseley J (2014) Endogenous RNA interference is driven by copy number. *eLife* 3:e01581.
6. Miller A, Yang B, Foster T, & Kirchmaier AL (2008) Proliferating cell nuclear antigen and ASF1 modulate silent chromatin in *Saccharomyces cerevisiae* via lysine 56 on histone H3. *Genetics* 179(2):793-809.
7. Cioci F, *et al.* (2003) Silencing in yeast rDNA chromatin: reciprocal relationship in gene expression between RNA polymerase I and II. *Mol Cell* 12(1):135-145.
8. Kelly TJ, Qin S, Gottschling DE, & Parthun MR (2000) Type B histone acetyltransferase Hat1p participates in telomeric silencing. *Mol Cell Biol* 20(19):7051-7058.
9. Kobayashi T, Nomura M, & Horiuchi T (2001) Identification of DNA cis elements essential for expansion of ribosomal DNA repeats in *Saccharomyces cerevisiae*. *Mol Cell Biol* 21(1):136-147.
